# Supplementary material for: Buffer electrode layers tuned electrical properties, fatigue behavior and phase transition of KNN-based lead-free ferroelectric films
Source: Royal Society of Chemistry journal article supplement (doi:10.1039/d3tc02743k), 2023-01-01
Supplement: d3tc02743k1.pdf [file d3tc02743k1.pdf]

## Supporting information

### **Buffer Electrode Layers Tuned Electrical Properties, Fatigue Behavior and Phase Transition of KNN-Based Lead-Free Ferroelectric Films**

Liqiang Xu,<sup>a</sup> Beibei Zhu,<sup>a</sup> Song Dai,<sup>a</sup> Kun Han,<sup>a</sup> Pingfan Chen,<sup>a</sup> Ke Wang,<sup>d</sup> Zhen Huang,<sup>a,e,\*</sup> Wenbin Wu,<sup>b,c</sup> and Feng Chen<sup>b,\*</sup>

<sup>a</sup> Information Materials and Intelligent Sensing Laboratory of Anhui Province, Institutes of Physical Science and Information Technology, Anhui University, Hefei 230601, China

<sup>b</sup> Anhui Province Key Laboratory of Condensed Matter Physics at Extreme Condition, High Magnetic Field Laboratory, Chinese Academy of Sciences, Hefei, Anhui 230031, China

<sup>c</sup> Hefei National Laboratory for Physical Sciences at the Microscale, University of Science and Technology of China, Hefei 230026, China

<sup>d</sup> State Key Laboratory of New Ceramics and Fine Processing, School of Materials Science and Engineering, Tsinghua University, Beijing 100084, China

<sup>e</sup> Stony Brook Institute at Anhui University, Anhui University, Hefei 230039, China

\*Corresponding authors.

E-mail addresses: [huangz@ahu.edu.cn](mailto:huangz@ahu.edu.cn) (Z. Huang) and [fchen@hmfl.ac.cn](mailto:fchen@hmfl.ac.cn) (F. Chen)

These authors contributed equally to this work.

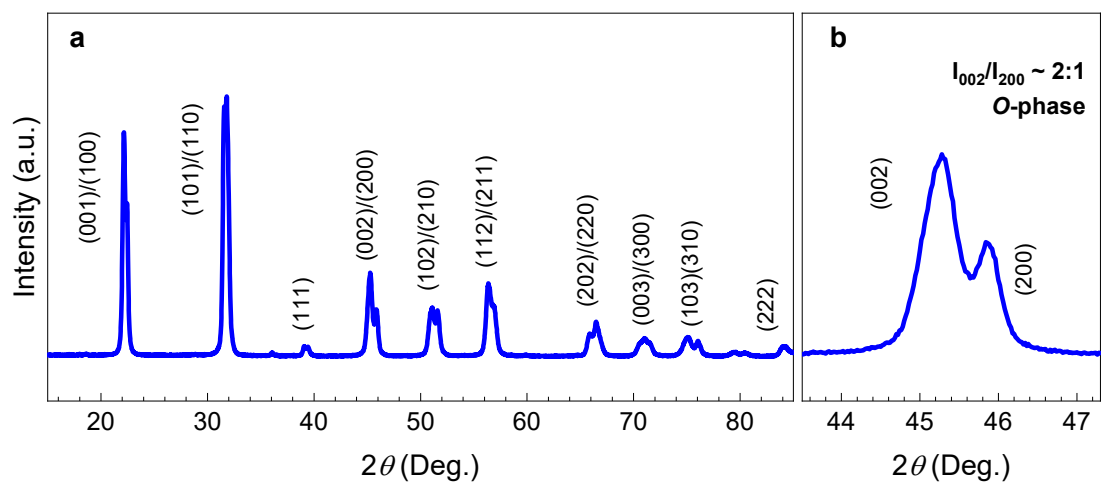

**Fig. S1** (a) The XRD pattern and (b) the enlarged part around (200)<sub>pc</sub> peak of the KNNLT-M target.

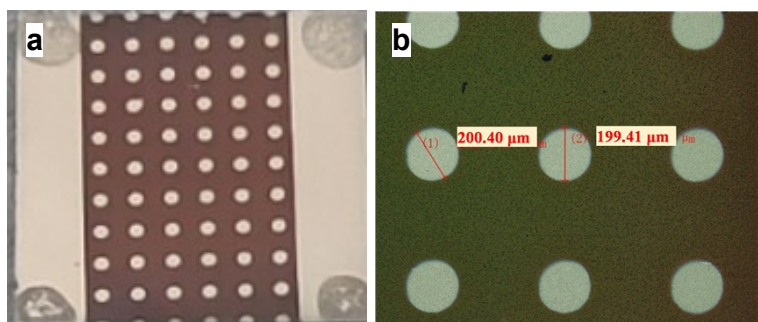

**Fig. S2** (a) The photo of real sample with Pt top electrode and (b) Pt electrode physical drawing.

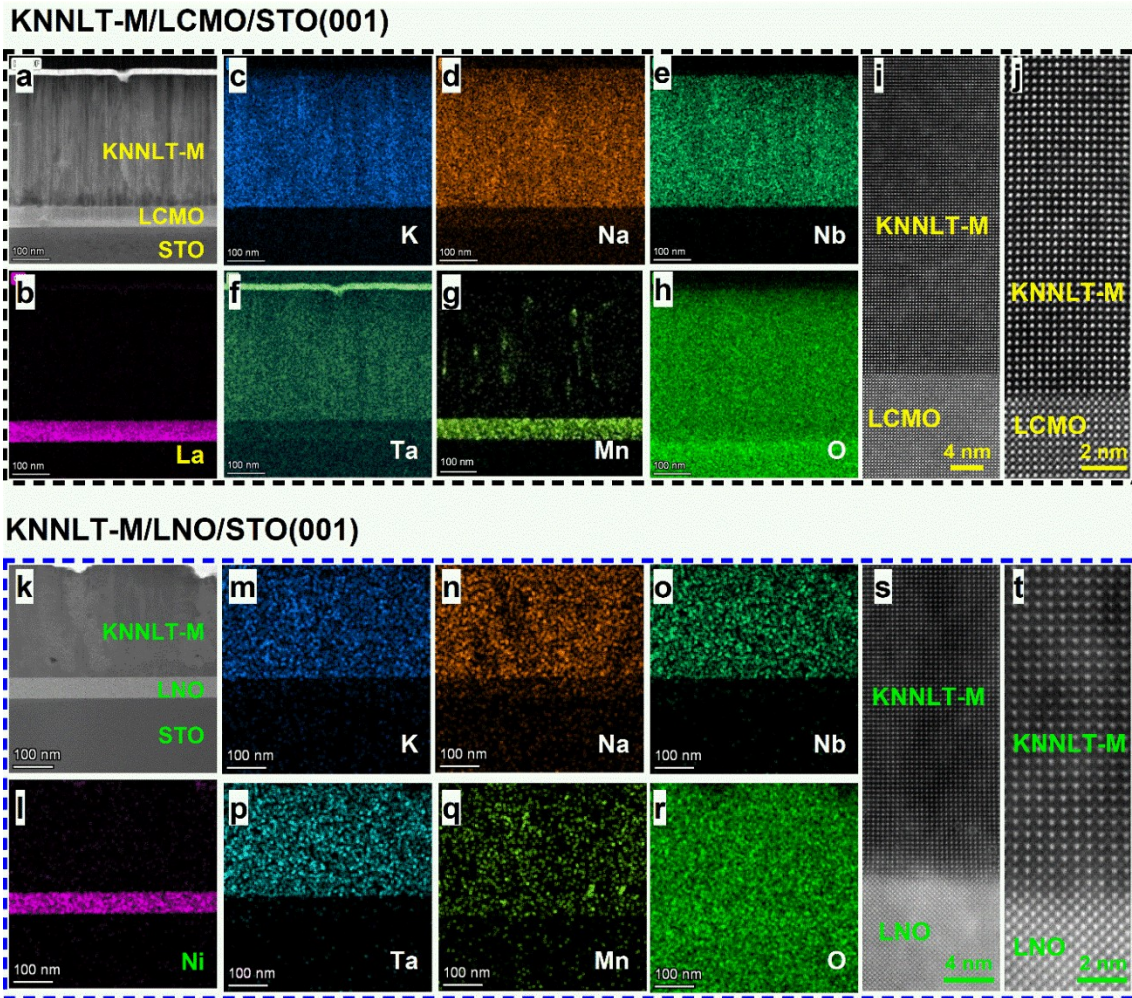

**Fig. S3.** The elemental analysis area and corresponding EDS maps of La, Ni, K, Na, Nb, Ta, Mn and O of KNNLT-M films grown on (a, b-h) LCMO and (k, l-r) LNO buffer electrode layers. The low-magnification and high-resolution cross-sectional images across the bottom interface of KNNLT-M films grown on the (i and j) LCMO and (s and t) LNO buffer electrode layers.

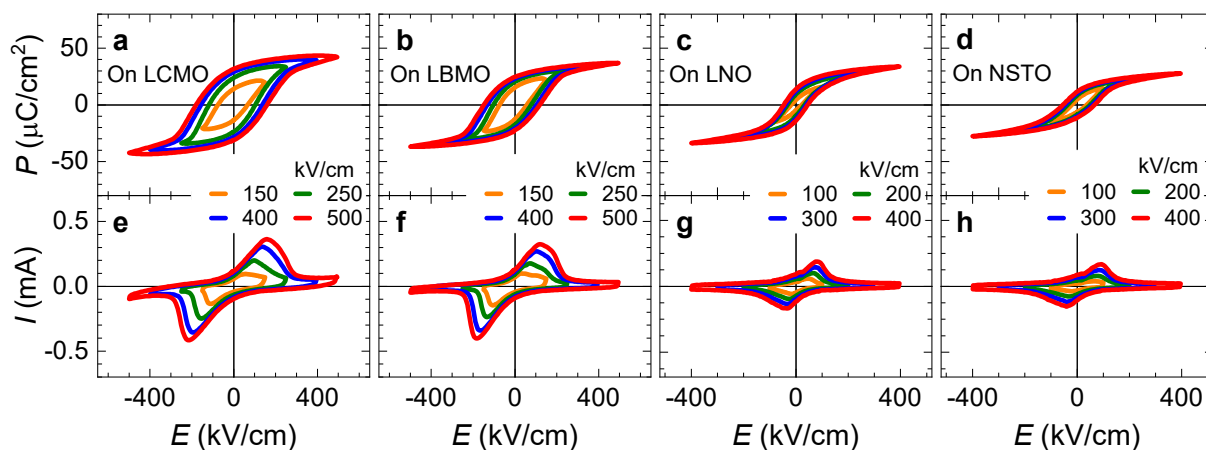

**Fig. S4** (a-d) The detailed room temperature  $P$ - $E$  hysteresis loops and (e-h) corresponding switching current curves measured at 1 kHz for KNNLT-M films grown on various buffer layer-coated STO (001) substrates under different electrical field.

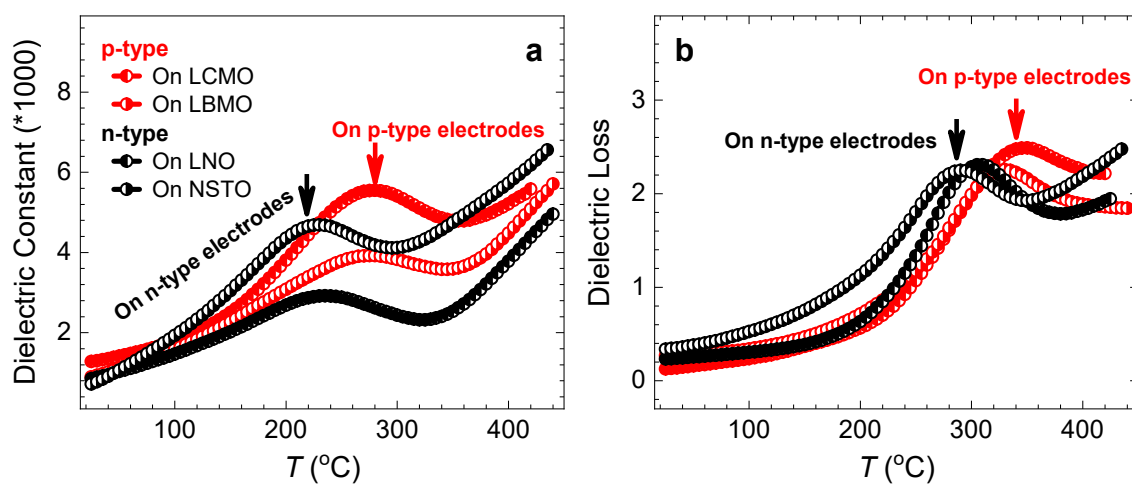

**Fig. S5.** The comparative phase transition characteristics identified by (a) temperature-dependent dielectric constant and (b) dielectric loss of KNNLT-M films grown on various buffer electrode layer-coated STO (001) substrates.
